# Supplementary material
Source: PubMed Central journal article supplement (PMC7501190)

**Supplementary Figure S3.** Cohort of 29 patients with somatic *BRCA1/2* mutations detected by Guardant360® targeted sequencing. Each column in the plot represents a patient. Within each patient's column, mutations detected are shown as dots, with the vertical position representing the mutant allele fraction (MAF) as percent. The white (unshaded) part of each column represents the maximum MAF detected across each patient's mutations (patients are shown in descending order of maximum MAF). Mutations in *BRCA1* and *BRCA2* are colored red and pink, respectively, and *BRCA1/2* mutations predicted to be pathogenic are shown as larger dots.

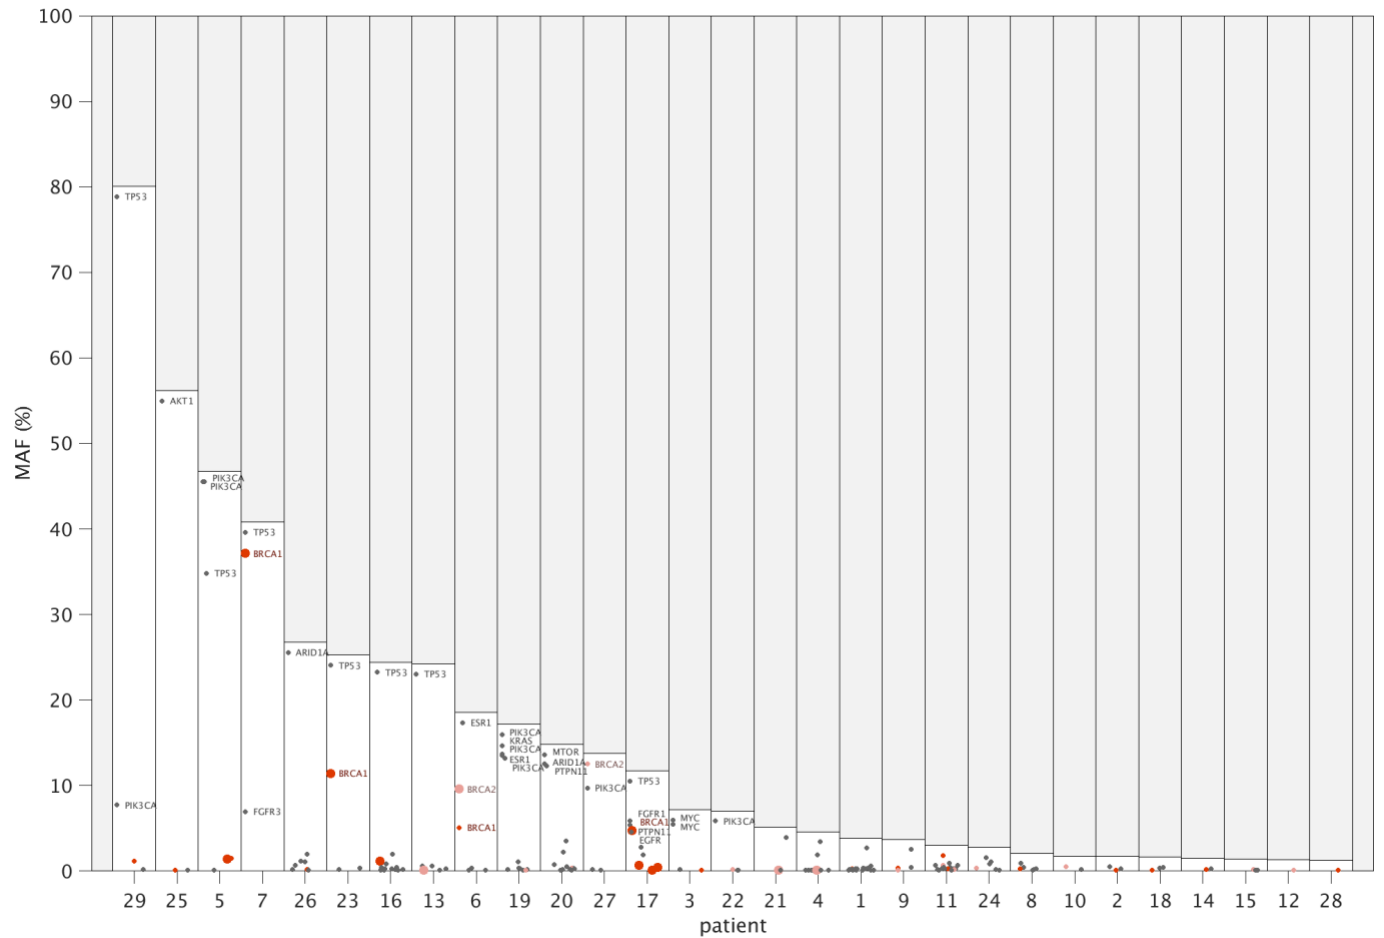

Supplement: NIHMS1606582-supplement-3.pdf [file NIHMS1606582-supplement-3.pdf]
