# Supplementary material
Source: PubMed Central journal article supplement (PMC7501190)
Supplement: NIHMS1606582-supplement-4.pdf [file NIHMS1606582-supplement-4.pdf]

## Supplemental Tables

Table S1. Clinical characteristics of patients with metastatic breast cancer undergoing cfDNA testing (N=215).

| <b>Clinical Variable</b>                                        | <b><i>BRCA1/2</i> mutation<br/>absent (<i>BRCA</i> wild-<br/>type/WT)</b> | <b><i>BRCA1/2</i> mutation<br/>present<br/>(<i>BRCA</i> mutant)</b> | <b>p value for<br/>difference<br/>between <i>BRCA</i><br/>WT and <i>BRCA</i><br/>mutant</b> |
|-----------------------------------------------------------------|---------------------------------------------------------------------------|---------------------------------------------------------------------|---------------------------------------------------------------------------------------------|
|                                                                 | <b>(N=186)</b>                                                            | <b>(N=29)</b>                                                       |                                                                                             |
| <i>Median age at<br/>metastatic breast<br/>cancer diagnosis</i> | 57 (48-65)                                                                | 53 (50-64)                                                          | 0.82                                                                                        |
| <i>Tumor Subtype</i>                                            |                                                                           |                                                                     | 0.48                                                                                        |
| HER2+                                                           | 11 (5.9%)                                                                 | 3 (10.3%)                                                           |                                                                                             |
| HR+                                                             | 134 (72%)                                                                 | 18 (62.1%)                                                          |                                                                                             |
| TNBC                                                            | 24 (12.9%)                                                                | 5 (17.2%)                                                           |                                                                                             |
| Unknown                                                         | 17 (9.1%)                                                                 | 3 (10.3%)                                                           |                                                                                             |
| <i>Number of prior<br/>lines of<br/>chemotherapy</i>            |                                                                           |                                                                     | 0.18                                                                                        |
| 0-1                                                             | 124 (66.7%)                                                               | 23 (79.3%)                                                          |                                                                                             |
| ≥2                                                              | 61 (32.8%)                                                                | 6 (20.7%)                                                           |                                                                                             |
| Unknown                                                         | 1 (0.5%)                                                                  | 0 (0%)                                                              |                                                                                             |
| <i>First therapy post-<br/>cfDNA testing</i>                    |                                                                           |                                                                     | 0.73                                                                                        |
| Endocrine                                                       | 57 (30.6%)                                                                | 10 (34.5%)                                                          |                                                                                             |
| HER2 therapy                                                    | 13 (7.0%)                                                                 | 2 (6.9%)                                                            |                                                                                             |
| Immunotherapy                                                   | 14 (7.5%)                                                                 | 4 (13.8%)                                                           |                                                                                             |
| Chemotherapy                                                    | 49 (26.3%)                                                                | 6 (20.7%)                                                           |                                                                                             |
| Other                                                           | 36 (19.4%)                                                                | 3 (10.3%)                                                           |                                                                                             |
| None                                                            | 13 (7.0%)                                                                 | 2 (6.9%)                                                            |                                                                                             |
| Unknown                                                         | 4 (2.2%)                                                                  | 2 (6.9%)                                                            |                                                                                             |

**Table S2. Detailed clinical characteristics and classification of *BRCA1/2* mutations detectable by cfDNA.**

| Patient ID | Age at primary breast cancer diagnosis | Age at MBC diagnosis | Presence of visceral metastases at time of cfDNA testing?<br>Y=yes, N=no | MBC therapies prior to cfDNA testing# | cfDNA <i>BRCA1/2</i> result | Specific cfDNA <i>BRCA1/2</i> alteration | Type of <i>BRCA1/2</i> cfDNA mutation | Previous known germline-pathogenic versus novel variant* | 1st therapy post cfDNA testing | Time interval between tumor tissue genotyping and cfDNA specimens (days); F=tumor tissue genotyping test failure, NS=tumor tissue genotyping not sent+ |
|------------|----------------------------------------|----------------------|--------------------------------------------------------------------------|---------------------------------------|-----------------------------|------------------------------------------|---------------------------------------|----------------------------------------------------------|--------------------------------|--------------------------------------------------------------------------------------------------------------------------------------------------------|
| 2          | 75                                     | 83                   | Y                                                                        | None                                  | <i>BRCA1</i>                | <i>BRCA1</i> V1590A                      | SNV, missense                         | Novel Variant                                            | AI                             | 28                                                                                                                                                     |
| 3          | 38                                     | 61                   | Y                                                                        | Tamoxifen, SERD, SERD                 | <i>BRCA1</i>                | <i>BRCA1</i> S681R                       | SNV, missense                         | Novel Variant                                            | SERD/CDK 4/6 inh               | 778                                                                                                                                                    |
| 4          | 46                                     | 65                   | Y                                                                        | None                                  | <i>BRCA2</i>                | <i>BRCA2</i> R2520                       | SNV, nonsense                         | Known Germline-Pathogenic                                | SERD/CDK 4/6 inh               | NS                                                                                                                                                     |
| 5          | 27                                     | 36                   | Y                                                                        | PI3K inh                              | <i>BRCA1</i>                | <i>BRCA1</i> Q1240E                      | SNV, missense                         | Known Germline-Pathogenic                                | Novel ADC                      | -71                                                                                                                                                    |
| 6          | 45                                     | 47                   | Y                                                                        | CDK 4/6 inh/AI                        | <i>BRCA2</i>                | <i>BRCA2</i> p.Thr3033fs                 | indel                                 | Known Germline-Pathogenic                                | None                           | 400                                                                                                                                                    |
|            |                                        |                      |                                                                          |                                       | <i>BRCA1</i>                | <i>BRCA1</i> V627I                       | SNV, missense                         | Novel Variant                                            |                                |                                                                                                                                                        |

|    |    |    |   |                                   |              |                              |               |                           |                |      |
|----|----|----|---|-----------------------------------|--------------|------------------------------|---------------|---------------------------|----------------|------|
| 7  | 47 | 47 | N | None                              | <i>BRCA1</i> | <i>BRCA1 W1712</i>           | SNV, nonsense | Known Germline-Pathogenic | None           | 29   |
| 8  | 47 | 52 | N | SERD, AI/mTOR, SERD, Capecitabine | <i>BRCA1</i> | <i>BRCA1 I1766M</i>          | SNV, missense | Novel Variant             | None           | 3693 |
| 9  | 63 | 64 | N | None                              | <i>BRCA2</i> | <i>BRCA2 E2364Q</i>          | SNV, missense | Novel Variant             | Capecitabine   | 288  |
| 10 | 60 | 67 | Y | None                              | <i>BRCA2</i> | <i>BRCA2 K1367T</i>          | SNV, missense | Novel Variant             | CDK 4/6 inh/AI | NS   |
| 11 | 58 | 67 | N | SERD, Novel ADC                   | <i>BRCA1</i> | <i>BRCA1 E1033Q</i>          | SNV, missense | Novel Variant             | Capecitabine   | 789  |
|    |    |    |   |                                   | <i>BRCA2</i> | <i>BRCA2 Q684K</i>           | SNV, missense | Novel Variant             |                |      |
|    |    |    |   |                                   | <i>BRCA1</i> | <i>BRCA1 E761K</i>           | SNV, missense | Novel Variant             |                |      |
| 12 | 53 | 53 | Y | None                              | <i>BRCA2</i> | <i>BRCA2 H2365Y</i>          | SNV, missense | Novel Variant             | Herceptin/AI   | F    |
| 13 | 44 | 45 | Y | Cisplatin, Vinorelbine            | <i>BRCA2</i> | <i>BRCA2 E471</i>            | SNV, nonsense | Known Germline-Pathogenic | Novel ADC      | -327 |
| 14 | 68 | 70 | Y | SERD                              | <i>BRCA1</i> | <i>BRCA1 G275D</i>           | SNV, missense | Novel Variant             | CDK 4/6 inh/AI | NS   |
| 15 | 44 | 51 | Y | None                              | <i>BRCA2</i> | <i>BRCA2 Q548H</i>           | SNV, missense | Novel Variant             | SERD           | 2560 |
| 16 | 51 | 51 | Y | None                              | <i>BRCA1</i> | <i>BRCA1 Splice Site SNV</i> | SNV, splice   | Known Germline-Pathogenic | Carboplatin    | NS   |

|    |    |    |   |                                                                                                                             |              |                                                   |               |                                  |                                     |     |
|----|----|----|---|-----------------------------------------------------------------------------------------------------------------------------|--------------|---------------------------------------------------|---------------|----------------------------------|-------------------------------------|-----|
| 17 | 39 | 47 | Y | Capecitabine,<br>clinical trial,<br>Carboplatin,<br>Cisplatin, Doxil                                                        | <i>BRCA1</i> | <i>BRCA1</i><br><i>Exon 10</i><br><i>Deletion</i> | indel         | Known<br>Germline-<br>Pathogenic | Glutaminase<br>inhibitor/Paclitaxel | F   |
| 18 | 40 | 40 | N | Tamoxifen, AI,<br>SERD/CDK 4/6<br>inh                                                                                       | <i>BRCA1</i> | <i>BRCA1</i><br><i>R466W</i>                      | SNV, missense | Novel Variant                    | Capecitabine                        | 703 |
| 19 | 50 | 54 | Y | AI, AI/SERD,<br>AI/mTOR inh,<br>Capecitabine,<br>AI/CDK 4/6 inh,<br>Nab-paclitaxel,<br>Eribulin,<br>Paclitaxel +<br>RAF inh | <i>BRCA2</i> | <i>BRCA2</i><br><i>E2947K</i>                     | SNV, missense | Novel Variant                    | Paclitaxel +<br>HDAC inh            | 4   |
| 20 | 49 | 57 | Y | SERD/CDK 4/6<br>inh                                                                                                         | <i>BRCA2</i> | <i>BRCA2</i><br><i>E2391K</i>                     | SNV, missense | Novel Variant                    | CDK 4/6<br>inh/AI/mTOR              | 6   |
| 21 | 48 | 50 | Y | None                                                                                                                        | <i>BRCA2</i> | <i>BRCA2</i><br><i>Exon 11</i><br><i>Deletion</i> | indel         | Known<br>Germline-<br>Pathogenic | None                                | NS  |
| 23 | 46 | 46 | Y | Paclitaxel,<br>Carboplatin,<br>Novel ADC                                                                                    | <i>BRCA1</i> | <i>BRCA1</i><br><i>Splice Site</i><br><i>SNV</i>  | SNV, splice   | Known<br>Germline-<br>Pathogenic | HDAC inh + PD-1<br>inh              | 169 |
| 24 | 46 | 53 | N | None                                                                                                                        | <i>BRCA2</i> | <i>BRCA2</i><br><i>E2081Q</i>                     | SNV, missense | Novel Variant                    | T-DM1                               | 47  |

|                             |    |    |   |                                                                          |              |                     |                 |               |                                          |      |
|-----------------------------|----|----|---|--------------------------------------------------------------------------|--------------|---------------------|-----------------|---------------|------------------------------------------|------|
| 25                          | 48 | 50 | Y | AI, SERD/PI3K inh, SERD, CDK 4/6inh/AI/mTOR inh, Capecitabine, Novel ADC | <i>BRCA1</i> | <i>BRCA1 S864L</i>  | SNV, missense   | Novel Variant | None                                     | 1380 |
| 27                          | 48 | 52 | Y | None                                                                     | <i>BRCA2</i> | <i>BRCA2 E1021K</i> | SNV, missense   | Novel Variant | Trastuzumab/<br>Pertuzumab/<br>Docetaxel | NS   |
| 29                          | 57 | 61 | Y | SERD/CDK 4/6 inh, Capecitabine, Eribulin, Vinorelbine                    | <i>BRCA1</i> | <i>BRCA1 R1076T</i> | SNV, missense   | Novel Variant | Novel ADC                                | NS   |
| <b>Synonymous Mutations</b> |    |    |   |                                                                          |              |                     |                 |               |                                          |      |
| 1                           | 48 | 50 | Y | CDK 4/6 inh/AI, CDK 4/6 inh/AI/mTOR inh                                  | <i>BRCA1</i> | <i>BRCA1 L1664L</i> | SNV, synonymous | Novel Variant | Novel ADC                                | 574  |
| 5                           | 27 | 36 | Y | PI3K inh                                                                 | <i>BRCA1</i> | <i>BRCA1 F1226F</i> | SNV, synonymous | Novel Variant | Novel ADC                                | -71  |
| 9                           | 63 | 64 | N | None                                                                     | <i>BRCA1</i> | <i>BRCA1 P364P</i>  | SNV, synonymous | Novel Variant | Capecitabine                             | 288  |

|    |    |    |   |                           |              |                     |                 |               |              |     |
|----|----|----|---|---------------------------|--------------|---------------------|-----------------|---------------|--------------|-----|
| 11 | 58 | 67 | N | SERD, novel ADC           | <i>BRCA2</i> | <i>BRCA2 Q1138Q</i> | SNV, synonymous | Novel Variant | Capecitabine | 789 |
| 22 | 55 | 79 | N | None                      | <i>BRCA2</i> | <i>BRCA2 D3095D</i> | SNV, synonymous | Novel Variant | AI           | 39  |
| 26 | 80 | 83 | Y | Capecitabine, AI/mTOR inh | <i>BRCA1</i> | <i>BRCA1 G1543G</i> | SNV, synonymous | Novel Variant | None         | NS  |
| 28 | 47 | 55 | Y | AI/CDK 4/6 inh            | <i>BRCA1</i> | <i>BRCA1 S1377S</i> | SNV, synonymous | Novel Variant | None         | 578 |

#Therapies abbreviated as follows. *Inh* inhibitor, *CDK* cyclin dependent kinase, *SERD* selective estrogen receptor degrader, *AI* aromatase inhibitor, *PI3K* phosphoinositide 3-kinase, *mTOR* mammalian target of rapamycin, *RAF* rapidly accelerated fibrosarcoma, *ADC* Antibody Drug Conjugate.

\*Classification by certified genetic counselors at our institution, based on ClinVar<sup>18</sup> and reputable genetic testing laboratories. Previously known germline-pathogenic variants have been denoted as “known germline-pathogenic,” and rest as “novel variant.”

+Negative value indicates cfDNA being sent prior to tumor tissue genotyping.

## Supplemental Information- Results

### *Patient Demographics*

Somatic *BRCA1/2* mutations were seen across breast cancer subtypes, including hormone receptor (HR) positive disease (8.4% of total population), triple-negative breast cancer (TNBC) (2.3%), and human epidermal growth factor receptor 2 (HER2) positive disease (1.4%), and unknown subtype (1.4%).

Seventy-six percent of patients with somatic *BRCA1/2* mutations had visceral disease, while the rest (24%) had non-visceral disease.

Of the 29 patients with somatic *BRCA1* or *BRCA2* mutations, 21 of 29 had genotyping of archival tumor conducted, of which 52.4% had tumor tissue genotyping on a metastatic lesion at the time of MBC diagnosis, 33.3% on a metastatic lesion post MBC diagnosis, and 14.3% on a primary tumor specimen. Test failure occurred in 9.5%.

### *Characteristics of cfDNA *BRCA1/2* mutations*

A significant portion of patients had documented negative germline *BRCA1/2* results, but these were not available for all patients. Of the 28 patients without a known germline *BRCA1/2* mutation, 12 (42.9%) had documented negative germline testing, and the remaining 16 (57.1%) did not have a family history consistent with a *BRCA1/2* phenotype although they did not have documented germline *BRCA1/2* testing results available, based on review of records. While the Guardant360® platform was previously not reporting germline *BRCA1/2* mutations detected in cfDNA, we conducted a post hoc analysis in collaboration with Guardant360® to confirm that the majority of patients did not have germline *BRCA1/2* mutations, based on

cfDNA analysis which can detect putative germline mutations <sup>46</sup>. Patient ID # 19 was found to have a cfDNA *BRCA1* c.2239 C>T mutation, which appeared to be a germline variant of uncertain significance, but no other germline *BRCA1/2* mutations were noted.

The *BRCA1* variants in 3 cases were identical in the blood and metastatic tumor tissue (patient ID # 7: *BRCA1* ENSP00000350283.3:p.Trp1712Ter (ENST00000357654.3:c.5136G>A); specimens collected 29 days apart); patient ID # 23: *BRCA1* splice donor variant (ENST00000357654.3:c.4986+1G>A; specimens collected 169 days apart). In the third case (patient ID # 19), there was a *BRCA1* mutation detected on tumor genotyping of a metastatic lesion, but a *BRCA2* mutation was identified by concurrent cfDNA analysis. On further discussion with Guardant360®, on a post hoc analysis, the *BRCA1* mutation noted in tissue was also identified in cfDNA as a germline variant of uncertain significance (but this result had been suppressed as the platform was initially not reporting germline variants). These specimens were collected within a few days of each other and may therefore represent spatial heterogeneity in tumor lesions and representation in cfDNA. Similarly, among 5 patients who had concurrent tumor tissue genotyping and cfDNA analysis (within a time interval of 40 days), only 2 of these cases demonstrated identical blood and tumor tissue *BRCA1* variants (patient ID #7 and #19), highlighting potential spatial heterogeneity in MBC.

We also observed that for 12/19 patients for whom tumor tissue genotyping results were available, the tumor tissue genotyping assay may not have covered the precise *BRCA1/2* mutation detected by cfDNA. However, in 5/7 cases where the tumor tissue genotyping assay did cover the specific identified *BRCA1/2* mutation seen by cfDNA, the tumor tissue genotyping assay did not identify the mutation seen in the blood.



### *Coexisting cfDNA mutations*

In patients who had *BRCA1* cfDNA mutations alone (n=15), the most common coexisting cfDNA mutations were *TP53* (53.3%), *PIK3CA* (33.3%), *NF1* (20%), *EGFR* (20%), and *RHOA* (20%). In contrast, in patients who had *BRCA2* cfDNA mutations alone (n=11), the most common coexisting mutations were *PIK3CA* (63.6%), *TP53* (36.4%), *ERBB2* (27.3%), and *NF1* (27.3%).

### *Impact of cfDNA BRCA1 or BRCA2 mutation status on outcomes*

We evaluated the impact of cfDNA *BRCA1* or *BRCA2* mutation status on PFS on the first therapy post-cfDNA testing (Supplemental Figure S2a) and OS (Supplemental Figure S2b), including the impact of known germline-pathogenic somatic *BRCA* mutations (n=9) on PFS on the first therapy post-cfDNA testing (Supplemental Figure S2c) and OS (Supplemental Figure S2d); no significant impact of somatic *BRCA1/2* or known germline-pathogenic somatic *BRCA1/2* status, respectively, were seen in these analyses, but the small sample size precludes definitive conclusions.

For patients with somatic *BRCA1/2* mutant MBC, the median follow-up period was 4.7 months from the start of the first treatment post-testing and 18.7 months from the diagnosis of MBC. For patients with *BRCA1/2* WT MBC, the median follow-up period was 5.3 months from the start of the first treatment post-testing, and 22.1 months from the diagnosis of MBC. *BRCA1/2* cfDNA mutation status did not significantly impact PFS on the first therapy post-cfDNA testing (HR 1.07, 95% CI: 0.60-1.88, p=0.82) or OS (HR 1.14, 95% CI: 0.4-3.3, p=0.81). Overall, in a multivariate analysis adjusting for age and number of prior therapies, *BRCA1/2* cfDNA mutation status did not significantly affect PFS on the first therapy post-cfDNA testing or OS (data not shown).

In patients with cfDNA *BRCA1/2* mutations, there was a trend towards slightly improved median progression with receipt of chemotherapy compared with *BRCA1/2* WT patients (5.0 months vs 3.0 months), but similar median progression on hormone therapy (11.7 months vs 12.9 months), but given the small numbers, the results should be considered hypothesis generating and require validation in a larger dataset.

For patients with known germline-pathogenic somatic *BRCA1/2* mutations, the median follow up period was 5.1 months from the start of the first therapy post-testing, and 12.2 months from the diagnosis of MBC. *BRCA1/2* known germline-pathogenic somatic mutation status did not significantly impact PFS on the first therapy post cfDNA testing (HR 0.85, 95% CI: 0.31-2.33, p=0.76) or OS (HR 1.33, 95% CI: 0.18-10, p=0.78), compared to the aforementioned *BRCA1/2* WT population, though the results should be interpreted with caution given the relatively small numbers of patients in the known germline-pathogenic *BRCA1/2* mutant cohort limiting power to observe a statistically significant difference in outcomes. Similarly, a difference in outcomes between patients with known germline-pathogenic *BRCA1/2* mutations and those with novel variants could not be demonstrated given the small sample sizes of these cohorts, limiting the power to observe a statistically significant difference.

We observed the clinical response to a PARP inhibitor or platinum chemotherapy in 3 patients with known germline-pathogenic somatic *BRCA* mutations who received these treatments post cfDNA testing (remainder did not receive these treatments). The first patient (patient ID #16 from whom a CTC-culture line was developed as described in the manuscript) had a previously known germline-pathogenic *BRCA1* mutation in the absence of a germline *BRCA* mutation and derived therapeutic benefit with carboplatin (approximately 6 months), but not eribulin (disease progression within 3 months). A second patient (patient ID # 21) who similarly had a known germline-pathogenic *BRCA2* mutation in the absence of a germline *BRCA* mutation received the combination of carboplatin and paclitaxel for 16 months followed by carboplatin and liposomal doxorubicin for an additional 4 months. Finally, a third patient (patient ID # 17) with a known germline-pathogenic *BRCA1* mutation in the setting of a co-

existing known germline *BRCA* mutation received olaparib for 3.5 months with response. While definite conclusions cannot be drawn from this small sample of patients treated with platinum chemotherapy or a PARP inhibitor, these findings are hypothesis generating and should be evaluated further in prospective studies.
