# Supplementary material
Source: PubMed Central journal article supplement (PMC7501190)

**Supplemental Figure S1.** Consort diagram of patients included in this study.

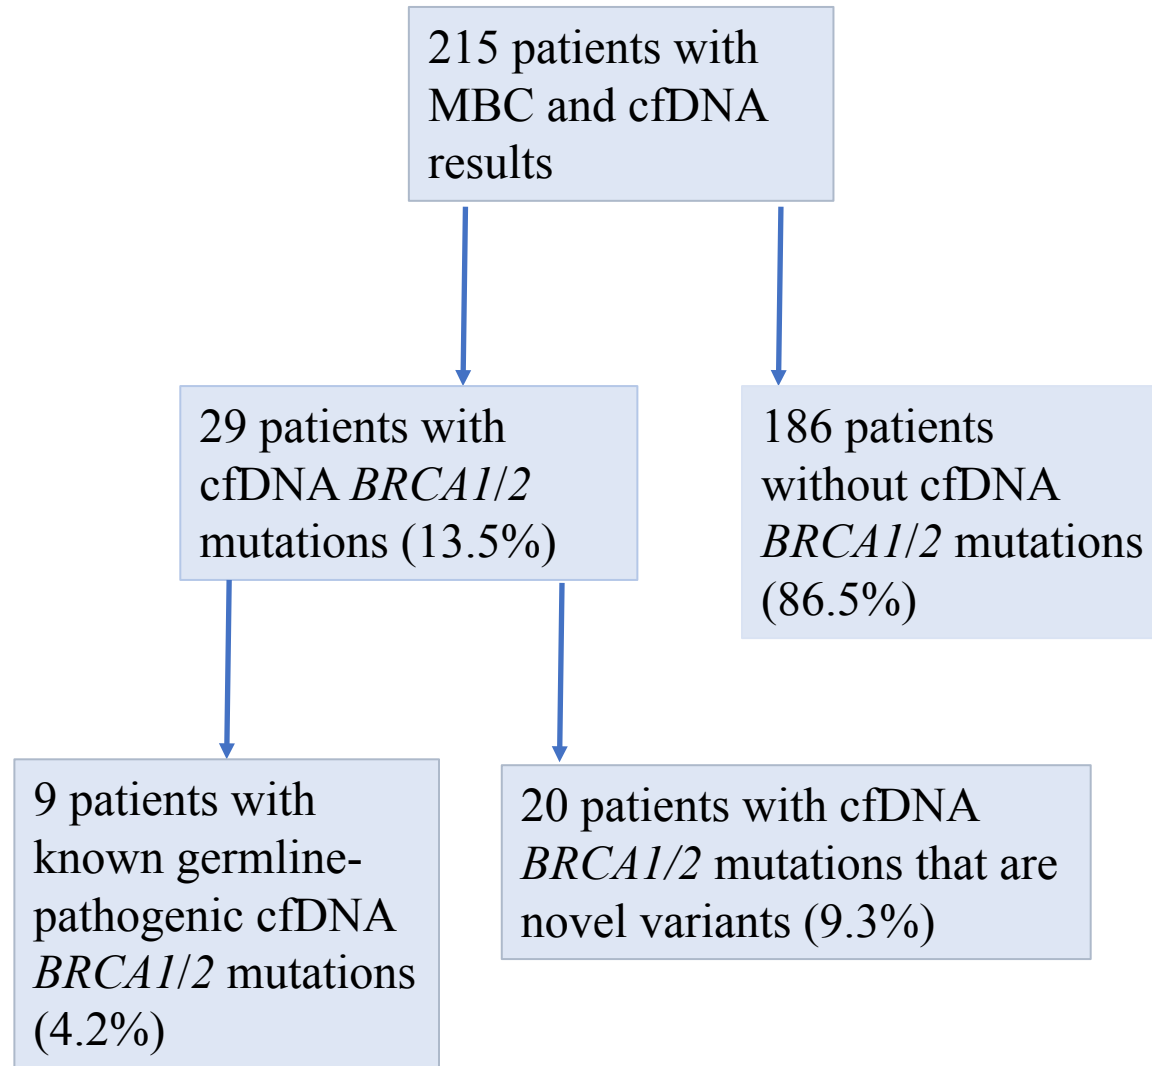

Supplement: NIHMS1606582-supplement-1.pdf [file NIHMS1606582-supplement-1.pdf]
